# Supplementary material
Source: PubMed Central journal article supplement (PMC8771431)
Supplement: jamasurg-e216902-s001.pdf [file jamasurg-e216902-s001.pdf]

1  
2  
3  
4  
5  
6  
7  
8  
9  
10  
11  
12  
13  
14  
15  
16  
17  
18  
19  
20  
21  
22  
23  
24  
25  
26  
27  
28  
29  
30

**Protocol**

**This trial protocol has been provided by the authors to give readers additional information about their work.**

**Protocol for: Rosen et al. Randomized Controlled Trial Comparing Biologic versus Synthetic Mesh for the Single Stage Repair of Contaminated Ventral Hernias.**

**Submitted to JAMA Surgery.**

- 31 This supplement contains the following items:
- 32 1. Original protocol, final protocol with amendments and summary of changes.
- 33 2. Original statistical analysis plan (protocol description), final statistical analysis
- 34 plan, summary of changes
- 35

|    |                                                                            |              |
|----|----------------------------------------------------------------------------|--------------|
| 36 |                                                                            |              |
| 37 |                                                                            |              |
| 38 |                                                                            |              |
| 39 | <b>Executive Summary</b>                                                   | <b>4-6</b>   |
| 40 | <b>Table of Contents</b>                                                   | <b>7-9</b>   |
| 41 | <b>Original Protocol</b>                                                   | <b>10-50</b> |
| 42 | <b>Summary of changes to the protocol approved by the ethics committee</b> | <b>51-52</b> |
| 43 | <b>Final statistical analysis plan (with modifications)</b>                | <b>53-58</b> |
| 44 |                                                                            |              |

## Executive Summary of Protocol

45  
46  
47  
48  
49  
50  
51  
52  
53  
54  
55  
56  
57  
58  
59  
60  
61  
62  
63  
64  
65  
66  
67  
68  
69  
70  
71  
72  
73  
74  
75  
76  
77  
78  
79  
80  
81  
82  
83  
84  
85  
86  
87  
88  
89  
90

### Study Synopsis

**Title:** Multicenter, prospective randomized trial comparing biologic versus synthetic mesh for the repair of contaminated ventral hernias

### Investigational Product

Soft Mesh, Bard Davol  
Strattice Mesh, Lifecell

### Protocol Number

NCT#02451176  
IDE# G120130

### Study Design

Multicenter, parallel group, randomized controlled trial

### Number of Sites

Up to 5 academic medical centers with specialized abdominal wall reconstruction units

### Number of Subjects

253 contaminated ventral hernias

### Study Population

Male and female patients at least 21 years of age presenting with a clean-contaminated or contaminated ventral hernia for planned single stage repair

### Study Treatment

Medium weight polypropylene mesh or non-crosslinked porcine dermis mesh placed in the retromuscular position during complex abdominal wall reconstruction

### Study Objective

To determine the safety and efficacy of synthetic mesh as compared to biologic mesh for the single staged repairs of contaminated ventral hernias

### Study Endpoints

Primary Outcome

1. Efficacy- Incidence of hernia recurrence at 2 years following hernia repair.
2. Safety-Incidence of surgical site occurrence requiring a procedural intervention (SSOPI) throughout the study period.

Secondary Outcome

- 91 1. Incidence of postoperative adverse events at 30 days  
92 postoperatively measured by overall adverse event rate, Clavien  
93 Dindo Grades I-V, and Comprehensive Complications Index  
94 2. Hernia related quality of life at baseline, 1m, 6m,12m, and 24 m  
95 as measured by HerQles abdominal wall function score  
96 3. Overall quality of life at baseline, 1m, 6m,12m, and 24 m as  
97 measured by EQ5D summary score and VAS score  
98 4. Cost of abdominal wall reconstruction of contaminated defects  
99 as measured by direct cost, 30 day costs and prosthetic cost.

100

### 101 **Clinic Visits**

102 Baseline, surgical admission, 30 days, 6 months, 12 months, and 24  
103 months

104

### 105 **Study Criteria**

106

#### Inclusion Criteria

107

1. age  $\geq 21$

108

2. hernia defects  $\geq 9$  cm<sup>2</sup>

109

3. contaminated wound class (CDC II or III)

110

4. elective single-staged repair

111

5. intraoperative achievement of fascial closure

112

6. willing candidates to receive either polypropylene or a biologic  
113 prosthesis.

114

#### 115 Exclusion Criteria

116

1. CDC wound class I or IV

117

2. BMI  $>45$  kg/m<sup>2</sup>

118

3. chronic immunosuppression ( $>10$  mg of prednisone/day)

119

4. collagen vascular disorder

120

5. severe malnutrition (albumin  $<2.0$  g/dL)

121

6. ascites refractory to medical management

122

7. end stage renal disease (on hemodialysis)

123

8. liver disease (hepatitis B and C or total bilirubin  $>3.0$  mg/dL)

124

9. smoking within 1 month of surgery

125

10. pregnancy

126

11. undergoing minimally invasive repair

127

12. active mesh infection. Mesh infection is defined as synthetic  
128 mesh that is not incorporated, exposed, or has chronic draining  
129 sinus with pus around the material.

130

## Biologic vs. Synthetic M

|                                                   | Screening Visit                            | Pre-Definitive Closure | Day of Definitive Closure | Follow Up |  |
|---------------------------------------------------|--------------------------------------------|------------------------|---------------------------|-----------|--|
|                                                   | $\leq 45$ days prior to Definitive Closure |                        |                           | 4 Weeks   |  |
| Inclusion/Exclusion                               | x                                          | x                      |                           |           |  |
| Informed Consent                                  | x                                          | x                      |                           |           |  |
| Medical History                                   | x                                          |                        |                           |           |  |
| Physical Exam                                     | x                                          |                        | x                         |           |  |
| CBC                                               | x                                          |                        |                           |           |  |
| Comp Metabolic panel                              | x                                          |                        |                           |           |  |
| Albumin                                           | x                                          |                        |                           |           |  |
| prealbumin                                        | x                                          |                        |                           |           |  |
| HbA1`C                                            | x                                          |                        |                           |           |  |
| Urinalysis                                        | x                                          |                        |                           |           |  |
| CT-Abdomen Pelvis                                 | x                                          |                        |                           |           |  |
| Pre-op Standard of care                           | x                                          | x                      | x                         |           |  |
| Randomization                                     |                                            |                        | x                         |           |  |
| Placement of Study Mesh/Investigator Fee          |                                            |                        | x                         |           |  |
| Assessment of Repair Failure or Hernia Recurrence |                                            |                        |                           | x         |  |
| QOL Assessment                                    | x                                          |                        |                           | x         |  |
| Adverse Event Assessment                          | x                                          |                        |                           | x         |  |

|     |                                                  |
|-----|--------------------------------------------------|
| 133 |                                                  |
| 134 | <b>Table of Contents</b>                         |
| 135 | <b>1. Objectives</b>                             |
| 136 | <b>a. Primary</b>                                |
| 137 | <b>b. Secondary</b>                              |
| 138 | <b>2. Background and Rationale</b>               |
| 139 | <b>3. Experimental Plan</b>                      |
| 140 | <b>a. Study Design</b>                           |
| 141 | <b>b. Number of Centers</b>                      |
| 142 | <b>c. Number of Subjects</b>                     |
| 143 | <b>d. Estimated Study Duration</b>               |
| 144 | <b>4. Subject Eligibility</b>                    |
| 145 | <b>a. Inclusion Criteria</b>                     |
| 146 | <b>b. Exclusion Criteria</b>                     |
| 147 | <b>5. Subject Enrollment</b>                     |
| 148 | <b>a. Subject Registration</b>                   |
| 149 | <b>b. Randomization and Treatment Assignment</b> |
| 150 | <b>c. Screen Failures</b>                        |
| 151 | <b>6. Treatment Procedures</b>                   |
| 152 | <b>a. Surgical Procedure</b>                     |
| 153 | <b>b. Mesh Properties</b>                        |
| 154 | <b>7. Study Procedures</b>                       |
| 155 | <b>a. Assessments</b>                            |
| 156 | <b>b. Follow up</b>                              |
| 157 | <b>c. Endpoint Determination</b>                 |
| 158 | <b>i. Definition of Endpoints</b>                |

|     |                                                |
|-----|------------------------------------------------|
| 159 | ii. Data Collection                            |
| 160 | 8. Removal of subjects                         |
| 161 | a. Lost to follow up                           |
| 162 | 9. Adverse Event Reporting                     |
| 163 | a. Definitions                                 |
| 164 | i. Adverse Events                              |
| 165 | ii. Serious Adverse Events                     |
| 166 | b. Reporting Procedures for All Adverse Events |
| 167 | c. Serious Adverse Event Reporting Procedures  |
| 168 | 10. Statistical Considerations                 |
| 169 | a. Study Design                                |
| 170 | b. Study Endpoints, and Covariates             |
| 171 | i. Primary Endpoint                            |
| 172 | ii. Secondary Endpoint                         |
| 173 | c. Sample Size Considerations                  |
| 174 | d. Planned Methods of Analysis                 |
| 175 | i. General Approach/Considerations             |
| 176 | ii. Analysis of Key Study Endpoints            |
| 177 | e. Study Oversight                             |
| 178 | i. Data Safety Monitoring Board (DSMB)         |
| 179 | 11. Investigational Product                    |
| 180 | a. Synthetic mesh                              |
| 181 | b. Biologic mesh                               |
| 182 | 12. Regulatory Obligations                     |
| 183 | a. Informed Consent                            |
| 184 | b. Subject Confidentiality                     |



|     |                                                 |
|-----|-------------------------------------------------|
| 185 | <b>13. Administrative and Legal Obligations</b> |
| 186 | <b>a. Protocol Amendments</b>                   |
| 187 | <b>b. Study Documentation and Storage</b>       |
| 188 | <b>c. Study Monitoring and Data Collection</b>  |
| 189 | <b>14. References</b>                           |
| 190 | <b>15. Appendix</b>                             |
| 191 |                                                 |

192 **1. Objectives**

193 The primary objective of this study is to determine the safety and efficacy of synthetic  
194 versus biologic mesh in the repair of clean contaminated and contaminated ventral  
195 hernias.

196 The specific aims of the proposal are:

197 1. To demonstrate that a single-stage repair of clean-contaminated (Class 2) or  
198 contaminated (Class 3) ventral hernias using a macroporous light-weight  
199 polypropylene synthetic mesh will result in superior clinical outcomes compared  
200 to a biologic mesh.

- 201 a. Task 1- Demonstrate that repairs of clean-contaminated and  
202 contaminated ventral hernias performed with macroporous light-weight  
203 polypropylene mesh will result in fewer recurrent hernias and fewer  
204 surgical site occurrences requiring procedural intervention at 24  
205 postoperative months compared to repairs of clean-contaminated and  
206 contaminated ventral hernias performed with biologic mesh.
- 207 b. Task 2- Compare postoperative pain, and demonstrate greater change in  
208 preoperative to postoperative quality of life (QOL) at 1 month, 6 months,  
209 12 months, and 24 months following clean-contaminated or contaminated  
210 ventral hernia repair with a macroporous light-weight polypropylene mesh  
211 versus a biologic prosthesis.

212 2. To demonstrate that a macroporous light-weight polypropylene mesh is the more  
213 cost-effective strategy than a biologic prosthetic in clean-contaminated and  
214 contaminated abdominal wall reconstruction.

- 215 a. Task 1-Estimate direct and indirect economic costs associated with clean-  
216 contaminated or contaminated ventral hernia repair using either  
217 polypropylene mesh or biologic mesh from a limited societal perspective.

- 218           b. Task 2 – Perform health utility valuation in patients undergoing repair of  
219           clean-contaminated or contaminated ventral hernias using either  
220           polypropylene mesh or biologic mesh.
- 221           c. Task 3 – Calculate and compare incremental cost-effectiveness ratios for  
222           patients undergoing repair of clean-contaminated or contaminated ventral  
223           hernias using polypropylene mesh versus biologic mesh.

224

## 225       **2. Background and Rationale**

226

227           Ventral hernia (VH) is a frequent sequela of abdominal surgery, occurring after  
228           up to 10-20% of laparotomy incisions.[1, 2] This results in almost 250,000 annual ventral  
229           hernia repairs in the United States, making it one of the most common procedures  
230           performed by general surgeons.[3] The annual health care expenditures associated with  
231           hernia repairs now exceeds \$5 billion US dollars. [4] Since prosthetic mesh has been  
232           shown to reduce recurrence rates by over 50%, most surgeons agree that some form of  
233           prosthetic reinforcement should be added to all but the smallest ventral hernia repairs.[5]  
234           Traditionally, this has involved a permanent prosthetic material in clean cases (without  
235           bacterial contamination) at relatively low cost (approximately \$150 for a 900cm<sup>2</sup> mesh).  
236           The management of more complex hernias where infection or contamination is present  
237           is not well defined. These patients are often severely disabled by the chronic infectious  
238           nidus and suffer a very poor quality of life until reconstruction of their abdominal wall  
239           anatomy and resolution of the infection. Historically, this has involved a two-stage  
240           approach for hernias where simultaneous gastrointestinal, biliary, and/or genitourinary  
241           procedures were performed or if there was an active infection of a prosthetic material.  
242           The first stage involved removing the infectious or contaminated source and performing

243 a temporary closure of the abdominal wall with an absorbable material. This approach of  
244 so-called “planned hernia” would almost uniformly require another major operation.

245         Approximately 6 months to one year later, the abdominal wall is repaired with a  
246 permanent synthetic material in a clean setting. This approach avoids placing the  
247 synthetic mesh in the field of contamination but is associated with significant morbidity  
248 as it requires two operations and potential long-term disability during the recovery  
249 period. Recognizing the limitations of this two-stage approach, new biologic materials  
250 have been designed to offer a single-stage approach for infected and contaminated  
251 abdominal wall reconstruction. These materials are derived from various sources  
252 including human or porcine dermis, bovine pericardium, or intestinal submucosa. They  
253 are processed in such a way as to render an acellular collagen-rich graft that reportedly  
254 acts as a cellular scaffold to allow native tissue in-growth and regeneration of tissue.  
255 They are marketed as resistant to infection and therefore as a suitable hernia repair  
256 material for clean-contaminated and contaminated abdominal wall defects. However,  
257 these products are very expensive with a 400cm<sup>2</sup> porcine dermal graft costing over  
258 \$10,000, and currently represent the most rapidly growing market in hernia repair, with  
259 estimates of almost \$500 million dollars in annual revenue by the year 2013.[6] Despite  
260 the rapid acceptance of these materials, there is little preclinical or clinical evidence to  
261 support their claims of regeneration, or that they provide a durable repair to the  
262 abdominal wall in the setting of a clean-contaminated (Class 2) or a contaminated (Class  
263 3) surgical procedure.

264         In our experience, the single-stage repair of contaminated abdominal wall defects  
265 with these biologic grafts has resulted in a 40%-80% recurrence rate with long term  
266 follow up.[7, 8] Given these disappointing results, other investigators have evaluated the  
267 role of synthetic mesh in the repair of contaminated abdominal wall defects in small,  
268 retrospective non-randomized trials.[9-11] Importantly, several recent modifications to

269 polypropylene mesh have yielded potential options for repairing contaminated defects.  
270 These modifications include reducing mesh weight, increasing mesh porosity, and  
271 utilizing monofilament unwoven material that resists bacterial colonization in animal  
272 studies.[12, 13] In fact, our lab has recently evaluated 9 commercially-available  
273 prosthetic materials and has found that certain meshes can clear bacterial contamination  
274 similar to biologic grafts in a rat hernia model. These materials have been used for years  
275 in clean repairs of large complex abdominal wall defects with significantly lower  
276 recurrence rates (<5%) than a biologic mesh.[14] Beyond doubt, a non-biased  
277 prospective randomized trial is long overdue to compare the safety and efficacy of a  
278 biologic graft versus a macroporous light-weight polypropylene synthetic material for the  
279 repair of complex ventral hernias. This study will compare the safety, efficacy, and cost-  
280 effectiveness of a permanent synthetic mesh versus a biologic prosthesis for the open  
281 repair of ventral hernias in the setting of clean-contaminated (Class 2) or contaminated  
282 (Class 3) surgical procedures.

283         This study will have a major impact on the field of hernia surgery, as the study  
284 findings will provide an objective guide to mesh selection, optimize surgical approaches  
285 for complex ventral hernia repair, and ultimately significantly improve patient outcomes.  
286 The lack of data as to the ideal mesh selection for complex ventral hernia repair has  
287 resulted in physicians relying on anecdotal experience, industry marketing, and personal  
288 bias. Presently, hundreds of thousands of patients are affected by this condition and  
289 would significantly benefit from clear practice guidelines regarding the best approach  
290 and the most appropriate prosthetic selection for repairing these complex ventral  
291 hernias. In order to address this important need, the overall safety, efficacy, and cost-  
292 effectiveness of a biologic prosthetic as compared to a synthetic material for the open  
293 repair of complex defects should be subjected to a prospective randomized clinical trial.

294 We hypothesize that reinforcement of single-stage open repairs of complex  
295 abdominal wall defects with a macroporous light-weight polypropylene synthetic mesh  
296 will result in significantly lower rates of hernia recurrence (HR) and surgical site  
297 occurrences requiring procedural intervention (SSOPI) at 24 postoperative months, and  
298 greater cost-effectiveness compared to reinforcement with a biologic mesh. We further  
299 hypothesize that reinforcement with macroporous light-weight polypropylene synthetic  
300 mesh will be associated with a significantly greater change in preoperative to  
301 postoperative patient-reported quality of life (QOL) compared to reinforcement with  
302 biologic mesh for clean-contaminated or contaminated ventral hernias.

303

### 304 **3. Experimental Plan**

#### 305 **a. Study Design**

306 We propose a multi-center parallel group, prospective randomized controlled trial  
307 comparing 253 patients with clean-contaminated (Class 2) or contaminated (Class 3)  
308 abdominal wall ventral hernias undergoing single-stage open repair. Patients will be  
309 recruited from surgical clinics at one of 5 major abdominal wall reconstruction units.  
310 After completing all screening and baseline procedures subjects will be randomized in a  
311 1:1 fashion to receive either Soft Mesh™ by CR Bard™, a macroporous monofilament  
312 polypropylene permanent mesh, or Strattice™ mesh by LifeCell™, a non-crosslinked  
313 porcine dermal biologic graft, for the single-stage open reconstruction of clean-  
314 contaminated and contaminated abdominal wall defects. The primary outcome  
315 variables will be the absence of surgical site occurrence requiring procedural  
316 intervention and the absence of a hernia recurrence from the time of surgery up to 24  
317 months of postoperative follow-up.

#### 318 **b. Number of Centers**

319 Patient recruitment and surgical procedures will be performed at one of 5  
320 academic medical centers with dedicated abdominal wall reconstruction units. Patients  
321 will be recruited directly from the respective medical center's surgery clinics.

322 **c. Number of Subjects**

323 A total of 253 subjects will be randomized 1:1 to receive either a synthetic or  
324 biologic mesh for the single stage treatment of a contaminated ventral hernia.

325 **d. Study Duration**  
326

327 It is estimated that this trial will take 2-4 years to accrue all the surgical patients  
328 and another 2 years to complete long term follow up.

329 **4. Subject Eligibility**

330 Investigators will maintain a screening log that includes all patients that were  
331 consented for the trial and reasons for ineligibility or refusal to participate.

332 **a. Inclusion Criteria**

333 Patients will be included in this study if they are 21 years of age or older (including  
334 women of childbearing age), undergoing a planned single-stage open reconstruction of a  
335 contaminated (CDC wound class 2 or 3) (Appendix 3) abdominal wall defect (including  
336 concomitant procedures: creation of a stoma, bowel resection, panniculectomy,  
337 removing uninfected mesh, and gastrointestinal, genitourinary, or gynecologic  
338 procedure) under general anesthesia, can achieve midline fascial closure, and have a  
339 parastomal hernia or midline defect at least 9 cm<sup>2</sup>.

340 **b. Exclusion Criteria**

341 Patients will be excluded from the study if they meet any of the following criteria:  
342 are undergoing a laparoscopic or robotic repair of the abdominal wall defect, have a  
343 CDC class 1 or 4 wound (see CDC guidelines below), have a defect that the surgeon  
344 cannot achieve primary fascial apposition and requires a bridge of mesh, body mass

345 index (BMI) >45 kg/m<sup>2</sup>, chronic immunosuppression including medically-induced with  
346 >10 mg of prednisone/day, collagen vascular disorder, severe malnourishment (albumin  
347 <2.0 g/dl), ascites refractory to medical management, end stage renal disease  
348 (indwelling hemodialysis or peritoneal dialysis), pre-existing liver disease (hepatitis B or  
349 C or total bilirubin >3.0 mg/dl), smoking history within 1 month of surgery, current  
350 pregnancy, require removal of a prior surgical mesh during a planned ventral hernia  
351 repair due to active mesh infection (as defined by a synthetic mesh that is not  
352 incorporated into the tissue, is extracorporeally exposed, or has a chronic draining sinus  
353 with clear fluid around the material; but not including synthetic mesh that is incorporated  
354 into the abdominal wall and not infected), are unable to undergo successful retro-rectus  
355 preperitoneal mesh placement, if they object to the implantation of porcine products, or if  
356 they are participating in other clinical trials.

## 357 **5. Subject Enrollment**

358 Patients will participate if they have a clean contaminated or contaminated wound and  
359 can undergo a single staged ventral hernia repair. If patients are deemed eligible, they  
360 will be consented and randomized to receive either a synthetic or biologic mesh at the  
361 time of ventral hernia repair. Subjects, or their legally acceptable representatives, must  
362 personally sign and date the consent form before the commencement of any screening  
363 procedure.

### 364 **a. Subject Registration**

365 i. After completion of informed consent, (Appendix 6) each subject will  
366 be registered into a RedCap database. All entries will be performed  
367 at one of the 5 sites performing the procedures. Subsequent follow  
368 up data will be completed by entering into local electronic medical  
369 record and completing appropriate clinical report forms, adverse



370 event forms and any other outcomes required. In addition, the  
371 subject's initials, OR date and site location will be entered.  
372 ii. The computer-generated randomization code will be generated for  
373 each subject. The first two digits will assign the site number, and the  
374 subsequent numbers will be the unique patient identifier.

375 **b. Randomization and Treatment Assignment**

376 i. Eligible patients will be randomized 1:1 in the operating room to  
377 undergo open retromuscular incisional hernia repair with either  
378 biologic or synthetic mesh after closure of the posterior sheath and  
379 just prior to mesh deployment. Randomization will be stratified by  
380 medical center, and CDC wound class (clean-contaminated or  
381 contaminated) and occurred through a central concealed  
382 randomization scheme housed in RedCap by using a random  
383 number of blocks with a 1:1 ratio of assigning patients to each arm.  
384 The investigator will be blinded to patient randomization assignment  
385 until the point of intra-operative device placement whereas patients  
386 will remain blinded to patient randomization until the conclusion of  
387 the study period.

388 **c. Screen Failures**

389 i. Registered subjects who are ineligible for the study based on  
390 screening assessments will be considered screen failures and  
391 registered as such with the reason for failure.

392 **6. Treatment Procedures**

393 a. Surgical Procedure

394 Patients undergoing open ventral hernia repair for clean-contaminated and  
395 contaminated abdominal wall hernias meeting inclusion criteria will be

396 randomized to receive a synthetic mesh or a biologic mesh. Randomization  
397 will be carried out using computer-generated randomization blocks at the  
398 time of enrollment. Stratified randomized will be used with the strata  
399 formulated by medical center then by clean-contaminated or contaminated  
400 surgical site class. The Investigator will be blinded to patient randomization  
401 assignment until the point of intra-operative device use following final CDC  
402 wound classification, whereas patients will remain blinded to patient  
403 randomization until the conclusion of the study period. Patients randomized  
404 to synthetic mesh will receive Soft Mesh™ (CR Bard™, Murray Hill, NJ), and  
405 those patients randomized to biologic mesh will receive Strattice™  
406 (LifeCell™, Branchburg NJ). The use of biologic and synthetic meshes in  
407 clean-contaminated and contaminated fields is considered experimental;  
408 however, the selection of these prosthetics was based on a careful review of  
409 the multiple animal models, preclinical data, and our own clinical experience  
410 with each of these materials placed in both clean and contaminated  
411 abdominal wall reconstructions.[15-21]

412

413 b. Mesh Properties

414 a. Soft Mesh™ is a medium-weight (44 g/m<sup>2</sup>) monofilament macroporous  
415 polypropylene synthetic mesh. It does not have an anti-adhesive barrier  
416 and must be place in an extraperitoneal position. Our lab has evaluated  
417 this material in a chronic rat infection model and has shown clearance  
418 rates of bacterial contamination comparable to biologic grafts (Figure 1).  
419 This prosthetic has become our material of choice for routine abdominal  
420 wall reconstruction and ventral hernia repairs, given its chemical and  
421 structural properties. In addition, we have also utilized Soft Mesh™ in the

422 retrorectus position in several cases of elective bowel surgery,  
423 parastomal hernia repair, and inadvertent enterotomies with excellent  
424 results including no mesh infections and no long-term hernia recurrences.  
425 Other authors have reported excellent outcomes with polypropylene-  
426 based synthetic material placed in the extraperitoneal position.[14]  
427 Interestingly, reports of placing several forms of polypropylene-based  
428 meshes with anti-adhesive barrier coatings into the peritoneal cavity for  
429 elective hernia repair with concomitant bowel surgery has shown very  
430 high rates of mesh sepsis and subsequent mesh excision.[22] Mesh  
431 placed in the intraperitoneal position comes in contact with the viscera  
432 and therefore requires some form of an anti-adhesive barrier. We noted  
433 that these anti-adhesive barriers prevent bacterial clearance in an  
434 experimental study (Figure 1). Based on our findings, it is likely that both  
435 the specific type of synthetic mesh and the compartment of the abdominal  
436 wall in which it is placed will have significant effects on bacterial  
437 clearance and success when placed in a clean-contaminated or  
438 contaminated field. Potential extraperitoneal compartments for mesh  
439 deployment include the onlay (placed above the fascia in the  
440 subcutaneous space) or a retro-rectus (below the muscles but above the  
441 peritoneum) position. The onlay position can result in early mesh  
442 exposure if wound infection or breakdown occurs and has been shown in  
443 other prospective randomized trials to result in a high rate of mesh  
444 infections.[23] Alternatively, the retro-rectus repair with synthetic mesh  
445 reinforcement has been demonstrated by multiple authors as a durable  
446 repair with very low rates of mesh infection and hernia recurrence.[14, 24]  
447 For these reasons, we feel it is particularly important to design this

448 experiment to use an unprotected macroporous medium-weight  
449 polypropylene mesh placed in the retro-rectus position.

450 b. The Strattice™ biologic mesh is derived from porcine dermis and  
451 processed to remove the cells but maximally preserve the dermal matrix.  
452 The processing avoids the use of collagen cross linking agents in a  
453 reported effort to minimize immunogenic response, improve  
454 biocompatibility, and ultimately promote rapid revascularization and tissue  
455 regeneration.[25] Multiple biologic grafts have been developed to repair  
456 contaminated abdominal wall defects, however little comparative data  
457 exists to definitively guide selection of these grafts. Our lab has  
458 performed several preclinical evaluations of these materials and has  
459 chosen Strattice™ based on our findings. Strattice™ mesh showed  
460 excellent biocompatibility from an immunologic perspective when  
461 compared to other human and porcine derived biologic products.[26] This  
462 selection should limit the potential for immunologic responses to the  
463 biologic material confounding our results. We also evaluated the ability of  
464 various biologic grafts to clear bacterial contamination in a chronic  
465 infection rodent model.[27] Strattice™ mesh had the highest rates of  
466 bacterial clearance when compared to other porcine derived materials.  
467 Interestingly, it appears that based on our findings, Soft Mesh™ and  
468 Strattice™ result in similar rates of bacterial clearance, which is the  
469 primary driving force of our renewed interest in evaluating the usage of  
470 these inexpensive synthetic meshes in clean-contaminated and  
471 contaminated fields.

## 472 **7. Study Procedures**

### 473 a. Assessment

474 All patients will undergo our standard pre-operative evaluation and data  
475 entered into the case report forms (Appendix 7). Briefly, it will include a  
476 complete set of laboratory studies including complete blood count,  
477 comprehensive metabolic panel, albumin, prealbumin, HbA1C (for diabetic  
478 patients), and urinalysis. Pregnancy test will be performed for those patients  
479 of child bearing potential. Photos may be taken of the anterior abdominal  
480 wall. An abdominal pelvic CT scan will be obtained preoperatively in all  
481 patients based on our standard approach, (abdominal pelvic CT scan within  
482 the past twelve months is sufficient) and any issues postoperatively  
483 (including suspected recurrence) will be evaluated with a CT scan or other  
484 radiologic imaging as clinically indicated. Preoperative demographics and  
485 clinical data including sex, race, age, body mass index (BMI), location of the  
486 hernia, length and width of the hernia defect, wound classification(per CDC  
487 guidelines, table 1), smoking status (active within 3 month of surgery),  
488 medical history, surgical history of prior abdominal surgical procedures and  
489 prior ventral/incisional hernia repairs will be documented. Intraoperative  
490 details will include patient ASA score, patient temperature, use of epidural  
491 catheters, size of fascial defect (measured as maximal width and length),  
492 fascial layers released (external oblique, posterior rectus sheath, or  
493 transversus abdominis muscle), adhesions, concomitant procedures, wound  
494 characterization, mesh type, mesh placement, operative time, estimated  
495 blood loss, blood transfusion requirement, perioperative antibiotic  
496 administration (including type, dose, frequency, and times of initiation and  
497 discontinuation), and intraoperative fluid administration. Postoperatively,  
498 patients will be evaluated for signs and symptoms of complications along  
499 with presence or absence of surgical site infections (SSIs) per CDC

500 definitions as categorized below, presence or absence of surgical site  
501 occurrences (SSOs) and any procedural interventions required to treat these  
502 SSOs, presence or absence of hernia recurrence and any reoperations,  
503 length of hospital stay, discharge date, time to return of bowel function and  
504 any readmission. Wound erythema treated with antibiotics will be considered  
505 a wound cellulitis. Wounds that are opened and cultured will be  
506 appropriately categorized as postoperative SSIs based on CDC definitions  
507 (Appendix 4). Type, dose, frequency, and duration of antibiotics will be  
508 recorded. Patients will also fill out HerQLes (Appendix 1) and EQ-5D  
509 (Appendix 2) quality of life tools preoperatively and during each post-  
510 operative visit, at 4 weeks ( $\pm 2$  weeks), 6 months ( $\pm 2$  months), 12 months ( $\pm$   
511 3 months), and 24 months ( $\pm 4$  months). There is substantial evidence that  
512 the majority of hernia recurrences occur within the first 24 months after  
513 repair.[5, 28, 29]

514 Preoperative antibiotic usage will be standardized (as per SCIP protocol) as  
515 follows. All patients will receive a second generation cephalosporin within 60 minutes  
516 prior to the surgical incisions. Patients with a prior history of penicillin allergy or MRSA  
517 wound/mesh infections will instead receive a preoperative dose of intravenous  
518 vancomycin. The exact drug, along with the dose, frequency, and time administered will  
519 be recorded. All antibiotics will be discontinued after 24 hours of surgery unless  
520 otherwise indicated. Prolonged antibiotic usage will be clearly documented as to  
521 indication, type, dose, frequency, and duration.

522 The surgical approach to repairing these defects will be standardized, as  
523 previously described. All patients will receive a chlorhexidine skin preparation, an  
524 iodine-impregnated skin barrier, and all stoma sites will be over sewn at the muco-  
525 cutaneous junction to limit bacterial contamination prior to skin preparation. If patients

526 have an allergy to chlorhexidine, then Duraprep™ will be utilized. For any patient who  
527 has an allergy to iodine, then a Steri-Drape may be used as a skin barrier. Hair will be  
528 removed at the time of surgery with electric clippers. The midline fascia will be opened  
529 and complete adhesiolysis performed to free up the entire abdominal wall. All  
530 concomitant procedures will be performed prior to beginning the abdominal wall  
531 reconstructive phase and documented. Intraoperative concomitant procedures will be  
532 allowed unless they change the wound classification to a class 4. Acceptable  
533 concomitant procedures include: the creation of a stoma, bowel resection,  
534 gastrointestinal surgery, genitourinary surgery, gynecological surgery, panniculectomy,  
535 and removing uninfected mesh. The abdominal wall is reconstructed by initially incising  
536 the posterior rectus sheath just lateral to the linea alba. The release is performed at  
537 least 5 centimeters above and below the fascial defect. The posterior rectus sheath is  
538 then separated off the rectus muscle to the linea semilunaris. If additional release is  
539 necessary to achieve fascial closure, the transversus abdominis muscle or the external  
540 oblique muscle may be released at the discretion of the surgeon and documented. The  
541 posterior components are then reapproximated to exclude the abdominal viscera from  
542 the mesh. If the mesh cannot be placed in the retro-rectus or preperitoneal position,  
543 then the patient will be excluded from the study. Unless contraindicated due to drug  
544 allergies, a pulse lavage antibiotic irrigation using a 3 liter bag with Gentamycin (240  
545 mg), Ancef (3gm), and Bacitracin (50,000 units) will be applied to the posterior rectus  
546 sheath and subcutaneous tissues after the components are reapproximated and prior to  
547 mesh placement. If there is a drug allergy, then pulse lavage irrigation with sterile saline  
548 only will be applied. Final wound classification will occur just prior to mesh placement  
549 per CDC criteria. Surgical wounds will be classified based on CDC criteria and only  
550 Class 2 and 3 wounds will be included in this study:

551

552 Class 2: Clean-Contaminated

553 Operative wounds in which the respiratory, alimentary, genital\*, or urinary tract  
554 are entered under controlled conditions, and without unusual contamination.

555 Specifically, operations involving the biliary tract, appendix, vagina, and  
556 oropharynx are included in this category, provided no evidence of infection or major  
557 break in technique is encountered.

558 \*Includes female and male reproductive tracts

559

560 Class 3- Contaminated

561 A surgical field with any of the following: open, fresh, accidental wounds;  
562 operations with major breaks in sterile technique or gross spillage from the  
563 gastrointestinal tract; and incisions in which acute, nonpurulent inflammation is  
564 encountered.

565

566 Following wound classification, the allocation of the patient to either the biologic mesh  
567 cohort or the permanent synthetic mesh cohort will be revealed to the operating surgeon,  
568 according to the previously-described computer-generated block randomization scheme  
569 stratified by wound classification and medical center. The corresponding prosthetic  
570 material will then be placed with at least 5 cm of fascial coverage on all sides of the  
571 defect. The mesh will be fixated with trans-abdominal #1 Maxon or PDS sutures at 5-10  
572 cm intervals. Number of sutures to secure the mesh will be documented. All patients  
573 will have closed suction drains placed above the mesh and below the fascial closure.  
574 These drains will be removed postoperatively when the collected fluid is < 30 cc/day for  
575 48 hours and documented. The fascia will be closed with a running or interrupted  
576 Maxon or PDS #1 suture. The skin will be closed loosely with staples. Dry sterile



577 dressings will be placed at the conclusion of the procedure and will be removed on  
578 postoperative day 2. No further dressings will be applied to the wound.

579

580 b. Follow up Phase

581 Patients will be evaluated in the surgeon's clinic at prespecified post-operative  
582 time points. Patients will receive a clinical exam, CRFs completed, patient  
583 reported outcomes will be completed and radiologic imaging will be performed if  
584 a recurrence is suspected. These time points will occur at 1 ( $\pm$ 15 days), 6 ( $\pm$ 2  
585 months), 12 ( $\pm$ 2 months), and 24 ( $\pm$ 4 months) months after surgery or  
586 additionally if complications occurred.

587 c. Definition of Endpoints

588 Postoperative complications will be defined and recorded on the CRF's based on CDC  
589 standardized terms and definitions for Surgical Site Infections as follow: [30, 31]-See  
590 appendix 4.

591

592 **Superficial Incisional Surgical Site infection (SSI)**

593 A **superficial incisional SSI** must meet the following criteria:

594 Infection occurs within 30 days after the operative procedure AND involves only skin and  
595 subcutaneous tissue of the incision AND patient has at least ONE of the following:

596 a. purulent drainage from the superficial incision.

597 b. organisms isolated from an aseptically-obtained culture of fluid or tissue from  
598 the superficial incision.

599 c. superficial incision that is deliberately opened by a surgeon and is culture-  
600 positive or not cultured AND the patient has at least one of the following signs or  
601 symptoms: pain or tenderness, localized swelling, redness, or heat. A culture-negative  
602 finding does not meet this criterion.

603 d. diagnosis of superficial incisional SSI by the surgeon or attending physician.

604

605 NOTE:

606 a. Do NOT report stitch abscess (minimal inflammation and discharge confined to  
607 suture penetration site) as an infection.

608 b. Do NOT report a localized stab wound or pin site infection. Instead, report  
609 these as skin or soft tissue infections, depending on their depth.

610 c. "Cellulitis" by itself does NOT meet criteria for superficial incisional SSI

611 d. If infection involves or extends into the fascial and muscle layers report as a  
612 deep incisional SSI.

613

614 **Deep Incisional SSI**

615 A **deep incisional SSI** must meet the following criteria:

616 Infection occurs within 30 or 90 days after the operative procedure AND the infection  
617 involves deep soft tissues (e.g., fascial and muscle layers) of the incision AND patient  
618 has at least ONE of the following:

619 a. purulent drainage from the deep incision but not from the organ/space  
620 component of the surgical site

621 b. a deep incision spontaneously dehisces or is deliberately opened by a surgeon  
622 AND is culture-positive or not cultured AND the patient has at least one of the following  
623 signs or symptoms: fever (>38°C), or localized pain, or tenderness. A culture-negative  
624 finding does not meet this criterion.

625 c. an abscess or other evidence of infection involving the deep incision is found on  
626 direct examination, during invasive procedure, or by histopathologic examination or  
627 imaging test.

628 d. diagnosis of a deep incisional SSI by a surgeon or attending physician.

629

630 NOTE:

631 a. Classify an infection that involves both superficial and deep incision sites as a  
632 deep incisional SSI.

633 b. Classify infection that involves superficial incisional, deep incisional, and  
634 organ/space sites as deep incisional SSI. This is considered a complication of  
635 the incision.

636

637

638 **Organ/Space SSI**

639 An **organ/space SSI** must meet the following criteria:

640 Infection occurs within 30 or 90 days after the operative procedure AND infection  
641 involves any part of the body, excluding the skin incision, fascia, or muscle layers that is  
642 opened or manipulated during the operative procedure AND the patient has at least  
643 ONE of the following:

644 a. purulent drainage from a drain that is placed into the organ/space

645 b. organisms isolated from an aseptically obtained culture of fluid or tissue in the  
646 organ/space

647 c. an abscess or other evidence of infection involving the organ/space that is  
648 found on direct examination, during invasive procedure, or by histopathologic  
649 examination or imaging test.

650 d. diagnosis of an organ/space SSI by a surgeon or attending physician and meets  
651 at least one criterion for a specific organ/space infection site listed in NHSN.

652 All study co-investigators agree to follow these CDC definitions of SSIs for study  
653 subjects enrolled in this trial to maximize objectivity of this study measure.

654

655 **Surgical Site Occurrence**

656 A surgical site occurrence (SSO) will be defined as a complication or adverse  
657 event occurring at the surgical site, including but not limited to, superficial, deep  
658 incisional, and organ/space surgical site infections. Consensus definitions and treatment  
659 plans for common SSOs following open complex ventral hernia repair were developed *a*  
660 *priori* by the co-investigators for the purposes of this study protocol (Appendix 6). All  
661 study co-investigators agree to follow these consensus definitions and treatment plans  
662 for study subjects enrolled in this trial to maximize objectivity of this outcome measure.  
663

664 **Surgical Site Occurrences Requiring Procedural Intervention**

665 A surgical site occurrence requiring procedural intervention (SSOPI) will be  
666 defined as a complication or adverse event occurring at a surgical site that is managed  
667 or treated with an invasive procedure. Consensus definitions and treatment plans for  
668 common SSOs following open complex ventral hernia repair were developed *a priori* by  
669 the co-investigators for the purposes of this study protocol (Appendix 5). All study co-  
670 investigators agree to follow these consensus definitions and treatment plans for study  
671 subjects enrolled in this trial to maximize objectivity of this study measure.  
672

673 **Ventral Hernia Recurrence**

674 A ventral hernia recurrence (HR) will be defined as any fascial defect of the  
675 anterior abdominal wall located within 7 cm of the index ventral hernia repair site  
676 detected by physical exam or abdominal computed tomography (CT) examination.  
677 These defects will be categorized as to whether they occur at the midline or parastomal  
678 hernia site, or both. Alternatively, for patients that are not amenable to come to the  
679 hospital for an in-person visit, recurrence will be assessed using a validated patient-  
680 reported outcome tool denominated the Ventral Hernia Recurrence Inventory

681 (VHRI)(Appendix 1).[32] The VHRI is a short 3-question survey that can be applied in  
682 person or through a telephone contact, and was shown to have higher sensitivity and  
683 specificity to diagnose hernia recurrence than physical examination. Also, it was shown  
684 to have the ability to rule out hernia recurrence when patients answer “no” to its  
685 questions. Patients that respond yes to any question in the hernia recurrence inventory  
686 will be encouraged to present for a clinical and radiographic evaluation. Any patient that  
687 reports a bulge and does not have further follow up will be considered to have a  
688 recurrence. All radiographic imaging will be reviewed by 3 blinded investigators and  
689 consensus (2 of 3) will be considered for confirmation of the repair integrity.

#### 690 **8. Removal of Subjects**

691 A subject has the right to withdraw from the study at any time, for any reason, without  
692 prejudice to his or her future medical care by the physician or at the institution. Any  
693 subject who withdraws consent to participation in the study will immediately be removed  
694 from further treatment and/or study observation on the date of request. The investigator  
695 has the right to withdraw a subject from the study if any of the following occurs:

- 696 • Refusal by the subject to continue observations
- 697 • Decision by the investigator that termination is in the subject’s best medical interest
- 698 • Loss to follow-up

699 Should a subject (or legally acceptable representative) request or decide to withdraw  
700 from the study, all efforts will be made to complete and report the observations as  
701 thoroughly as possible up to the date of withdrawal. All information should be reported  
702 on the applicable case report forms. A complete final evaluation and assessments  
703 should be made at the time of the subject’s withdrawal. The End of Study case report  
704 form will be completed with an explanation for the withdrawal. If the withdrawal of a  
705 subject is due to an adverse event, follow-up visits should be scheduled until the  
706 adverse event has resolved or stabilized. Unless consent has been withdrawn, follow-up

707 data on deaths and hospitalizations will be collected until study termination. However,  
708 unless specifically requested by the patient, the patient will be followed for the primary  
709 endpoint until end of study.

710 a. Lost to follow up

711 A patient will be considered lost to follow up after at least 6 attempts at  
712 contact via telephone, email and mailing of the patient reported outcomes forms  
713 with a 10 dollar incentive.

714

## 715 **9. Adverse Event Reporting**

716 a. Definitions

### 717 **i. Adverse Events**

718 An adverse event is an undesirable medical occurrence (sign,  
719 symptom, or diagnosis) that occurs in a subject after the initiation of  
720 the study, whether or not considered to be device related. Elective  
721 hospitalizations for pre-existing conditions (ie, any systemic illness  
722 or elective surgery) are not adverse events. Abnormal laboratory  
723 values should not be reported as adverse events; however, any  
724 clinical consequences of such abnormal values should be reported  
725 as adverse events.

### 726 **ii. Serious Adverse Events**

727 A serious adverse event is defined by regulatory agencies as one  
728 that suggests a significant hazard or side effect, regardless of the  
729 investigator's or sponsor's opinion on its relationship to  
730 investigational product. This includes, but may not be limited to, any  
731 event that (at any dose):

732 • is fatal

- 733 • is life-threatening (places the subject at immediate risk of death)
- 734 • requires in-patient hospitalization or prolongation of existing
- 735 hospitalization
- 736 • is a persistent or significant disability/incapacity
- 737 • is a congenital anomaly/birth defect

738 A hospitalization meeting the regulatory requirement for “serious”  
739 criteria is any in-patient hospital admission that includes a minimum  
740 of an overnight stay in a health care facility.

741  
742 Any event that does not exactly meet this definition yet which, in the  
743 investigator’s opinion, represents a significant hazard, can be  
744 assigned the “other significant hazard” regulatory reporting serious  
745 criteria.

746  
747 Additionally, important medical events that may not be immediately  
748 life-threatening or result in death or hospitalization but which may  
749 jeopardize a subject or require intervention to prevent one of the  
750 outcomes listed above, or result in urgent investigation, may be  
751 considered serious.

752

753 **b. Reporting Procedures for All Adverse Events**

754 All adverse events occurring after randomization observed  
755 by the investigator or reported by the subject (whether or not  
756 attributed to investigational product), will be reported on the case  
757 report form. Medically significant adverse events considered related  
758 to the investigational product by the investigator or the sponsor will

759 be followed until resolved or considered stable. The following  
760 attributes must be assigned by the investigator: description; dates of  
761 onset and resolution and action taken. The investigator may be  
762 asked to provide follow-up information.

763  
764 All adverse events, serious or not, that result in a subject's  
765 permanent withdrawal from the study must be reported in the CRF.  
766 The End-of-Study case report form will be completed, giving details  
767 of the withdrawal and, if needed, the General Comments case  
768 report form will also be completed.

769  
770 All deaths occurring on study must be reported and cause of death  
771 should be investigated. This includes deaths until the termination of  
772 the study or a maximum of 48 months since enrollment of the  
773 subject, whichever is earlier.

774  
775 It will be left to an investigator's clinical judgment as to whether or  
776 not an adverse event is of sufficient severity to require a subject's  
777 removal from treatment.

778

779

780 **c. Serious Adverse Event Reporting Procedures**

781 All serious adverse events must be reported in the CRF within 1  
782 working day of discovery or notification of the event. Initial serious  
783 adverse event information and all amendments or additions must be  
784 recorded on a Serious Adverse Event Report form.



785

786 **10. Statistical Considerations**

787 **a. Study Design**

788 i. Randomized controlled, parallel, single blinded multi-center trial

789 **b. Study Endpoints**

790 **i. Primary Endpoints**

791 1. Efficacy- hernia recurrence rate at 2 years' time point.

792 2. Safety-Rate of Surgical site occurrence requiring a procedural  
793 intervention (SSOPI) throughout the study period.

794 **ii. Secondary Endpoints**

795 **1. Adverse Events**

796 a. Overall Rates

797 b. Clavien Dindo Grades I-V

798 c. Comprehensive Complications Index

799 2. **Hernia Related Quality of Life- HERQLES**, Change from  
800 baseline

801 3. **Overall Quality of Life-EQ5D**, Change from baseline

802 4. **Cost**

803 **c. Sample Size Considerations**

804 i. We are investigating two primary outcomes: surgical site occurrences  
805 requiring procedural intervention (SSOPI) and hernia recurrence (HR).

806 Surgical site occurrences requiring procedural intervention (SSOPI) is a  
807 repeated binary outcome measurement. Hernia recurrence (HR) is a single

808 binary outcome measurement. In a multi-institutional retrospective review of

809 clean-contaminated and contaminated ventral hernia repair, hernia recurrence

810 rates were 29.21% versus 7%, and surgical site occurrences requiring

811 procedural intervention were 39.02% versus 9.01% for the biological mesh  
812 and permanent synthetic mesh cohorts, respectively. Based on review of  
813 these multi-institutional data, an estimated 253 patients will be enrolled in the  
814 proposed trial. Assuming a maximum 20% loss to follow-up, 202 patients will  
815 remain in the study sample for a 1:1 randomized allocation to each treatment  
816 arm (101 subjects per cohort). At the two-tailed overall (two hypotheses) type  
817 I error rate of 0.05, the study will have 92% power to detect a significant  
818 difference in the rates of hernia recurrence (29.21% vs. 7%, and a 100%  
819 power to detect a significant difference in surgical site occurrences requiring  
820 surgical intervention for the primary hypothesis (39.02% vs. 9.01%; with four  
821 repeated measurements and autoregressive correlation of  $\rho=0.5$ ) With 4  
822 centers each performing approximately 1 eligible procedures per week, there  
823 will be 192 total procedures performed per year, from which it would be  
824 feasible to achieve the total enrollment goal of 253 subjects within 2 years.

825 **d. Planned Methods of Analysis**

826 **i. General Approach**

827 Continuous data will be described using median values with  
828 interquartile ranges (IQR) and comparisons made using Wilcoxon's  
829 rank sum test. Categorical data will be described using counts and  
830 proportions with comparisons performed using Pearson's chi square  
831 or Fisher's exact test.

832 **ii. Analysis of Key Study Endpoints**

833 **1. Primary Endpoint**

- 834 a. **Specific Aim 1** - To demonstrate that a single-stage  
835 repair of clean-contaminated (Class 2) or  
836 contaminated (Class 3) ventral hernias using a

837 macroporous light-weight polypropylene synthetic  
838 mesh will result in superior clinical outcomes  
839 compared to a biologic mesh.

840 b. **Primary Analyses of Primary Outcomes:** The  
841 primary outcomes are rates of surgical site  
842 occurrences requiring procedural intervention (SSOPI)  
843 and hernia recurrence (HR) assessed postoperatively  
844 at 1 month, 6 months, 12 months, and 24 months. For  
845 SSOPI with 4 repeated binary measurements, a  
846 generalized mixed model analysis with repeated  
847 measures will be performed to determine if a  
848 significant difference exists between the biologic mesh  
849 and the permanent synthetic mesh cohorts in the rate  
850 of SSOPI. For HR, which is a single binary outcome,  
851 simple chi-square tests will be used for unadjusted  
852 analyses and a logistic regression model will be used  
853 for adjusted analyses. As this is a randomized trial,  
854 differences in baseline demographic and clinical  
855 characteristics between the biologic mesh cohort and  
856 the permanent synthetic mesh cohort are expected to  
857 occur at random. Any significant differences found  
858 among the demographic or preoperative clinical  
859 characteristics between the two treatment groups will  
860 be controlled for in the final analysis to limit potential  
861 confounding of results.

862 c. **Secondary Analyses of Primary Outcomes:**



889 hernia repairs, and mesh type. These models will be  
890 fit with Cox proportional hazards models. If other  
891 covariates are found to be highly imbalanced between  
892 groups or found to be associated with time-to-  
893 recurrence, they can also be included in multivariable  
894 models; however, this type of post-hoc model  
895 selection is to be considered inferior to the pre-  
896 specified models and is speculative in nature. A  
897 similar analysis will ensue for the time-to-a-healed-  
898 wound outcome. The null hypothesis is that the time-  
899 to-a-healed-wound is the same between the two  
900 groups (H0: Hazard Ratio = 1), and the alternative  
901 hypothesis is that the time-to-a-healed-wound is  
902 significantly greater for the permanent synthetic mesh  
903 cohort compared to the biologic mesh cohort (H1:  
904 Hazard Ratio not= 1).

## 905 **2. Secondary Endpoint**

906 The secondary outcomes are pain and quality of life  
907 (QOL). The assessment of the association between these  
908 outcomes and mesh type will parallel what was described above  
909 for the primary outcome. The differences are as follows. First,  
910 the primary analysis will utilize an ANCOVA model adjusting for  
911 baseline pain (QOL) and correlations among repeated  
912 measurements. The null hypothesis is that the pain (QOL) is the  
913 same, on average, between the synthetic and biologic mesh  
914 groups (H0: Beta-mesh-type = 0). The alternative hypothesis is

915 that the pain (QOL) is different, on average, between the two  
916 groups (H1: Beta-mesh-type not= 0). Second, the multivariable  
917 modeling will utilize multiple linear regressions. A mixed model  
918 analysis with repeated measures will be performed to determine  
919 if a significant difference exists between the biologic mesh and  
920 the permanent synthetic mesh cohorts in the mean change in  
921 score from the preoperative assessment to the postoperative  
922 assessments at 1 month, 6 months, 12 months, and 24 months  
923 for the EQ-5D and HerQLes quality of life instruments. The null  
924 hypothesis is that there is no significant difference between the  
925 biologic mesh and the permanent synthetic mesh cohorts in the  
926 mean change in score from the preoperative to the postoperative  
927 assessments at any of the time points for either the EQ-5D or the  
928 HerQLes quality of life instruments. The alternate hypothesis is  
929 that there is a significantly greater change in EQ-5D and  
930 HerQLes scores from the preoperative assessment to the  
931 postoperative assessment at each of the time points for the  
932 permanent synthetic mesh cohort compared to the biologic mesh  
933 cohort

934 In these data analyses, we will explore the possibility of  
935 medical center effect and treatment by medical center interaction.  
936 In particular, in the regression analyses, we will use indicator  
937 variables for medical center effect and indicator variable\*treatment  
938 for possible treatment by medical center interaction. If treatment  
939 by medical center interaction is significant, then it is more

940 appropriate that the treatment effects are summarized by medical  
941 center.

942 **Cost analysis: Demonstrate that a macroporous medium-**  
943 **weight polypropylene mesh is the more cost-effective strategy**  
944 **than a biologic prosthetic in clean-contaminated and contaminated**  
945 **abdominal wall reconstruction.**

946 The first task to address this specific aim will be to  
947 estimate direct and indirect economic costs associated with clean-  
948 contaminated and contaminated open ventral hernia repair. A  
949 micro-costing approach will be used assuming a limited societal  
950 perspective. Costs associated with the preoperative, operative,  
951 and postoperative phases of care will be considered as it pertains  
952 to the management of the ventral hernia. In most cases, one to  
953 two preoperative clinic visits will be necessary. Final operative  
954 costs will be based on each patient's actual inpatient encounter  
955 cost obtained from the participating institutions. Postoperative  
956 costs will account for routine outpatient visits, costs incurred for  
957 complications, and time lost from work due to ventral hernia  
958 management. All costs will be reported in U.S. dollars, adjusted  
959 for the years in which the data were obtained. Should institutional  
960 data not be available for a particular cost, the best available  
961 evidence from currently published analyses will be used. The  
962 second task for this specific aim is to perform health utility  
963 valuation in patients undergoing open repairs of clean-  
964 contaminated and contaminated ventral hernias. Patients will be  
965 administered the EQ-5D and the HerQLes instruments at one

966 preoperative visit and postoperatively at scheduled visits at 4  
967 weeks ( $\pm 2$  weeks), 6 months ( $\pm 2$  month), and 12 months ( $\pm 3$   
968 months), and 24 months ( $\pm 4$  months). HerQLes and EQ-5D  
969 valuations will be converted to health utility estimates based on  
970 published norms from the Agency for Healthcare Research and  
971 Quality (AHRQ). Quality-adjusted life years (QALYs) will be  
972 calculated based on these health utilities obtained in the  
973 postoperative phase. For a given strategy (light-weight  
974 macroporous polypropylene mesh or biologic mesh), it is  
975 anticipated that health utility variation will be affected more than  
976 survival. As such, calculations of QALYs will assume that all  
977 patients survive during the 24 month follow-up period, but differ in  
978 their health utility valuation.

#### 979 *Cost-Effectiveness Evaluation*

980 Once costs and QALYs have been calculated for each  
981 strategy, a decision analysis model will be constructed  
982 incorporating these values and the associated outcomes and  
983 complications that are thought to have an impact on which  
984 strategy is the better choice for patients. One-way and two-way  
985 sensitivity analyses will be performed to help determine the  
986 degree to which each variable impacts the decision to choose  
987 either a light-weight macroporous polypropylene mesh or biologic  
988 mesh for repair of clean-contaminated or contaminated ventral  
989 hernias. If appropriate, a multi-way probabilistic sensitivity  
990 analysis will be performed incorporating the uncertainty  
991 associated with known values for certain variables. Costs,



992 effectiveness (as measured by QALYs), cost-effectiveness ratios,  
993 and incremental cost-effectiveness ratios will be calculated to help  
994 determine the best strategy for mesh selection based on the  
995 results from this study and published data.

996

997 **e. Study Oversight**

998 **i. Data Safety and Monitoring Board (DSMB)**

999 The DSMB is an independent, multidisciplinary group comprised of  
1000 surgical and statistical representatives. Safety data (adverse events,  
1001 deep SSI rates, mesh infections, reoperations, and hernia recurrence  
1002 rates) will be analysed by an independent statistician and will be  
1003 reviewed on a 50 patient enrolment interval.

1004 The DSMB will be empowered to recommend early termination of the  
1005 study if there is evidence of harm or benefit based on all measures  
1006 reviewed.

1007 The complete monitoring plan can be found in Appendix 8.

1008

1009 **11. Investigational Product**

1010 **a. Strattice Mesh**

1011 **b. Bard Soft Mesh**

1012 **Compliance**

- 1013 i. Mesh products will be stored and handled in compliance with  
1014 standard of care processes at the local institution.
- 1015 ii. Patients randomized to each mesh shall undergo repair with the  
1016 assigned mesh. Any patient not receiving the allotted mesh will be  
1017 registered and considered a protocol violation.

1018 **12. Regulatory Obligations**

1019 **a. Informed Consent (see appendix 6)**

1020 For each subject, written informed consent will be obtained prior to  
1021 any protocol-related activities. As part of this procedure, the principal  
1022 investigator, surgeon co-investigator, or one of the approved study  
1023 coordinators must explain orally and in writing the nature, duration, and  
1024 purpose of the study in such a manner that the subject is aware of the  
1025 potential risks, inconveniences, or adverse effects that may occur. The  
1026 subjects will be informed that they may withdraw from the study at any time.  
1027 Subjects will receive all information that is required by federal regulations.

1028 After a potential study patient is identified, the investigator or the  
1029 study coordinator listed in this protocol as a person who will obtain consent  
1030 will be responsible for instituting the informed consent process in a face-to-  
1031 face manner. Before starting any study procedures, the investigator will  
1032 discuss the proposed research study in detail with the potential subject  
1033 during the office visit to discuss treatment options. The subject will be  
1034 allowed ample time to read and review the informed consent document, and  
1035 ask questions. The informed consent document will be reviewed with the  
1036 subject in depth by the participating investigator or designated member of  
1037 the research team to ensure that the potential participant has a good  
1038 understanding of the study protocol; what is required of the study  
1039 participants; the potential risks and benefits of study participation; and his or  
1040 her rights as a study participant. The investigators will be available by  
1041 phone or office visit to answer any questions that the participant may have.  
1042 After consideration, the subject may return if necessary for another visit with

1043 the investigator to discuss the study, ask questions, and sign the informed  
1044 consent document to participate in this study.

1045 After the subject has read and reviewed the informed consent  
1046 document and has agreed to participate, he/she will be asked to sign and  
1047 date the document. The study member obtaining consent will also sign and  
1048 date the form, and documentation of the informed consent process will be  
1049 included in the research file (i.e., the person who obtained consent, where  
1050 and when consent was obtained, and who was present during the process).  
1051 A copy of the consent form will be given to the subject.

1052 **PROVISIONS FOR SUBJECTS FROM VULNERABLE POPULATIONS**

1053 The population to be studied includes adults 21 years of age or over, so  
1054 children are therefore excluded. Decisionally-impaired and cognitively-  
1055 impaired persons will not be approached to participate in this study as we are  
1056 seeking subjects who have the capacity to understand and actively consent  
1057 to the procedure independently. Pregnant women will be excluded from  
1058 participating in this study.

1059 Staff and employees of the participating sites (Cleveland Clinic,  
1060 Greenville Health Systems Vanderbilt University Medical Center, and  
1061 Washington University ) are considered vulnerable populations. Staff and  
1062 employees of any of the participating sites may be eligible to participate in  
1063 this study. Since subjects may or may not benefit from this study, we do not  
1064 want to exclude this population. If an employee is a potential candidate for  
1065 this study, the subject will be informed during the consent process that his/her  
1066 participation or refusal to will in no way influence grades, employment, or  
1067 subsequent recommendations. Every effort will be made to prevent coercion  
1068 during this initial process and throughout study participation. According to

1069 IRB policy, students and house staff cannot be asked to participate in  
1070 research conducted while under the direct supervision of the investigator, so  
1071 those subjects will not be enrolled.

1072 In those instances where potential participants cannot read the consent  
1073 form because they do not speak English, we will work with the IRB to develop  
1074 a language-appropriate consent form. In addition, a qualified translator will  
1075 be present to assist with obtaining the informed consent of the participant.

1076 In addition, in the unusual situation where a subject cannot read a  
1077 consent form due to illiteracy or blindness, a member of the research study  
1078 staff will read and explain the consent form to the participant or to the  
1079 participant's legally-authorized representative. A witness, who will sign and  
1080 date the consent form, must also be present during this oral presentation.

1081 **b. Subject Confidentiality**

1082 Anonymity and confidentiality of subjects participating in this study  
1083 will be maintained. The only potential identifiers on any study documents  
1084 submitted to the sponsor or designee will be subject study numbers,  
1085 dates of birth, and dates of procedures. Every effort will be made to  
1086 maintain the confidentiality of documents that identify the subject by name  
1087 (e.g., signed informed consent documents, clinic charts), except to the  
1088 extent necessary to allow monitoring by the Center for Clinical Research  
1089 at Cleveland Clinic, internal monitoring by any of the participating sites,  
1090 or auditing by the FDA or other regulatory authorities. Should the name  
1091 and/or address of a subject participating in this trial be on a document  
1092 submitted to the FDA or other regulatory authority (e.g., laboratory  
1093 report), the name and/or address will be completely blocked out and  
1094 replaced with the subject study number.

1095                                 Additionally, patient charts and clinical records will be requested  
1096                                 and reviewed so that protocol adherence and source documentation can  
1097                                 be verified. There is a possibility that the Institutional Review Boards of  
1098                                 any of the participating sites, the Food and Drug Administration, and  
1099                                 possibly foreign regulatory agencies may review the de-identified study  
1100                                 records.

1101                                 All information collected, such as name or medical record number,  
1102                                 will be stored utilizing a customized Research Electronic Data Capture  
1103                                 (REDCap®) database program for multi-institutional data collection. This  
1104                                 is in a secure network/firewall protected electronic database to which only  
1105                                 the investigator and the designated members of the study team will have  
1106                                 access using an individual assigned login and password. Only approved  
1107                                 study members listed on the IRB protocol will have access to the  
1108                                 separately-stored master list. User rights will be assigned such that the  
1109                                 designated research coordinator at each site may only enter and review  
1110                                 data from that site. Only the Principal Investigator, Lead Research  
1111                                 Coordinators, and Biostatisticians will be granted access to retrieve  
1112                                 patient data from all sites for routine data quality assessments and data  
1113                                 analyses. All electronic records pertaining to the clinical study will be  
1114                                 password-protected, and only approved study members listed on the IRB  
1115                                 protocol will have password access.

1116                                 Any information about the subject collected on paper, as well as  
1117                                 the subject enrollment log linking the subjects to their identifiers, will be  
1118                                 kept under lock and key in the Department of Surgery at the  
1119                                 corresponding participating site.

1120                                 **13. Administrative and Legal Obligations**

1121  
1122  
1123  
1124  
1125  
1126  
1127  
1128  
1129  
1130  
1131  
1132  
1133  
1134  
1135  
1136  
1137  
1138  
1139  
1140  
1141  
1142  
1143

**a. Study Monitoring**

See Appendix 8

**b. Alternatives to Participation**

The subjects are under no obligation to participate in this study.

The subjects may decide not to have mesh used for their hernia repairs.

The PI or surgeon co-investigator at each site will discuss all available options. Those subjects not willing to participate in this study may be considered for the alternative treatment of primary defect closure/hernia repair with or without a similar biologic or synthetic product.

1144

14. References:

1145

- 1146 1. Mudge, M. and L.E. Hughes, *Incisional hernia: a 10 year prospective study of*  
1147 *incidence and attitudes*. Br J Surg, 1985. **72**(1): p. 70-1.
- 1148 2. Regnard, J.F., et al., *Ventral incisional hernias: incidence, date of recurrence,*  
1149 *localization and risk factors*. Ital J Surg Sci, 1988. **18**(3): p. 259-65.
- 1150 3. DeFrances, C.J., et al., *2006 National Hospital Discharge Survey*. Natl Health  
1151 Stat Report, 2008(5): p. 1-20.
- 1152 4. Poulouse, B.K., et al., *Epidemiology and cost of ventral hernia repair: making the*  
1153 *case for hernia research*. Hernia, 2011.
- 1154 5. Luijendijk, R.W., et al., *A comparison of suture repair with mesh repair for*  
1155 *incisional hernia*. N Engl J Med, 2000. **343**(6): p. 392-8.
- 1156 6. Harth, K.C. and M.J. Rosen, *Major complications associated with xenograft*  
1157 *biologic mesh implantation in abdominal wall reconstruction*. Surg Innov, 2009.  
1158 **16**(4): p. 324-9.
- 1159 7. Blatnik, J., J. Jin, and M. Rosen, *Abdominal hernia repair with bridging acellular*  
1160 *dermal matrix--an expensive hernia sac*. Am J Surg, 2008. **196**(1): p. 47-50.
- 1161 8. Jin, J., et al., *Use of acellular dermal matrix for complicated ventral hernia repair:*  
1162 *does technique affect outcomes?* J Am Coll Surg, 2007. **205**(5): p. 654-60.
- 1163 9. Kelly, M.E. and S.W. Behrman, *The safety and efficacy of prosthetic hernia repair*  
1164 *in clean-contaminated and contaminated wounds*. Am Surg, 2002. **68**(6): p. 524-  
1165 8; discussion 528-9.
- 1166 10. Campanelli, G., et al., *Intestinal resection and multiple abdominal hernia mesh*  
1167 *repair: is the combination safe and feasible?* Chir Ital, 2004. **56**(6): p. 839-42.
- 1168 11. Birolini, C., et al., *Elective colonic operation and prosthetic repair of incisional*  
1169 *hernia: does contamination contraindicate abdominal wall prosthesis use?* J Am  
1170 Coll Surg, 2000. **191**(4): p. 366-72.
- 1171 12. Engelsman, A.F., et al., *In vivo evaluation of bacterial infection involving*  
1172 *morphologically different surgical meshes*. Ann Surg, 2010. **251**(1): p. 133-7.
- 1173 13. Engelsman, A.F., et al., *Morphological aspects of surgical meshes as a risk*  
1174 *factor for bacterial colonization*. Br J Surg, 2008. **95**(8): p. 1051-9.
- 1175 14. Iqbal, C.W., et al., *Long-term outcome of 254 complex incisional hernia repairs*  
1176 *using the modified Rives-Stoppa technique*. World J Surg, 2007. **31**(12): p. 2398-  
1177 404.
- 1178 15. Bellows, C.F., A. Alder, and W.S. Helton, *Abdominal wall reconstruction using*  
1179 *biological tissue grafts: present status and future opportunities*. Expert Rev Med  
1180 Devices, 2006. **3**(5): p. 657-75.
- 1181 16. Celik, A., et al., *The shrinking rates of different meshes placed intraperitoneally: a*  
1182 *long-term comparison of the TiMesh, VYPRO II, Sepramesh, and DynaMesh*.  
1183 Surg Laparosc Endosc Percutan Tech, 2009. **19**(4): p. e130-4.
- 1184 17. Gaertner, W.B., M.E. Bonsack, and J.P. Delaney, *Visceral adhesions to hernia*  
1185 *prostheses*. Hernia, 2010. **14**(4): p. 375-81.
- 1186 18. Hiles, M., R.D. Record Ritchie, and A.M. Altizer, *Are biologic grafts effective for*  
1187 *hernia repair?: a systematic review of the literature*. Surg Innov, 2009. **16**(1): p.  
1188 26-37.
- 1189 19. Rosen, M.J., *Biologic mesh for abdominal wall reconstruction: a critical appraisal*.  
1190 Am Surg, 2010. **76**(1): p. 1-6.

1191 20. Rosen, M.J., et al., *A novel approach for the simultaneous repair of large midline*  
1192 *incisional and parastomal hernias with biological mesh and retrorectus*  
1193 *reconstruction*. Am J Surg, 2010. **199**(3): p. 416-20; discussion 420-1.  
1194 21. van 't Riet, M., et al., *Prevention of adhesion to prosthetic mesh: comparison of*  
1195 *different barriers using an incisional hernia model*. Ann Surg, 2003. **237**(1): p.  
1196 123-8.  
1197 22. Herbert, G.S., T.J. Tausch, and P.L. Carter, *Prophylactic mesh to prevent*  
1198 *incisional hernia: a note of caution*. Am J Surg, 2009. **197**(5): p. 595-8;  
1199 discussion 598.  
1200 23. Itani, K.M., et al., *Comparison of laparoscopic and open repair with mesh for the*  
1201 *treatment of ventral incisional hernia: a randomized trial*. Arch Surg, 2010.  
1202 **145**(4): p. 322-8; discussion 328.  
1203 24. Stoppa, R., [*Hernia surgery 1996*]. J Chir (Paris), 1996. **133**(6): p. 244-6.  
1204 25. Orenstein, S.B., et al., *Activation of human mononuclear cells by porcine biologic*  
1205 *meshes in vitro*. Hernia, 2010. **14**(4): p. 401-7.  
1206 26. Orenstein, S.B., et al., *Human monocyte activation by biologic and biodegradable*  
1207 *meshes in vitro*. Surg Endosc, 2010. **24**(4): p. 805-11.  
1208 27. Harth, K.C., et al., *Bacterial clearance of biologic grafts used in hernia repair: an*  
1209 *experimental study*. Surg Endosc, 2011. **25**(7): p. 2224-9.  
1210 28. Burger, J.W., et al., *Long-term follow-up of a randomized controlled trial of suture*  
1211 *versus mesh repair of incisional hernia*. Ann Surg, 2004. **240**(4): p. 578-83;  
1212 discussion 583-5.  
1213 29. Pollock, A.V. and M. Evans, *Early prediction of late incisional hernias*. Br J Surg,  
1214 1989. **76**(9): p. 953-4.  
1215 30. Garner, J.S., et al., *CDC definitions for nosocomial infections, 1988*. Am J Infect  
1216 Control, 1988. **16**(3): p. 128-40.  
1217 31. Mangram, A.J., et al., *Guideline for prevention of surgical site infection, 1999*.  
1218 *Hospital Infection Control Practices Advisory Committee*. Infect Control Hosp  
1219 Epidemiol, 1999. **20**(4): p. 250-78; quiz 279-80.  
1220 32. Baucom, R.B., et al., *Patient reported outcomes after incisional hernia repair-*  
1221 *establishing the ventral hernia recurrence inventory*. Am J Surg, 2016. **212**(1): p.  
1222 81-8.  
1223  
1224  
1225  
1226  
1227



1228 Figure 1:  
1229 A rodent model of incisional hernia and chronic infection after exposure to 10<sup>4</sup> colony  
1230 forming units of MRSA. Bacterial clearance as measured by total resolution of bacterial  
1231 growth. Strattice versus Soft Mesh p=0.32.

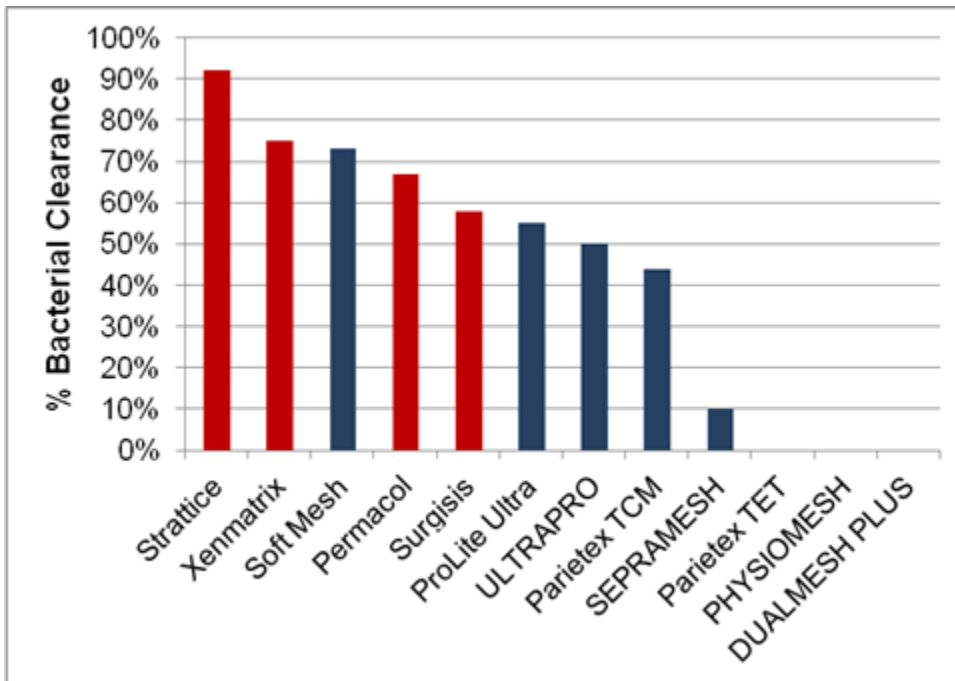

1232

1233

1234

1235

1236 Appendix 1: HerQLes and VHRI Questionnaire

1237 Appendix 2: EQ-5D Quality of Life Tool

1238 Appendix 3: CDC Wound Classification

1239 Appendix 4: CDC Definitions for Surgical Site Infections

1240 Appendix 5: Definitions and Treatment Plans for Surgical Site Occurrences

1241 Appendix 6: Informed Consent

1242 Appendix 7: Complete Case Report Forms

1243 Appendix 8: Study Monitoring Plan

1244

1245 **Summary of Significant Protocol Changes**

1246 1. PI, Michael Rosen left University Hospitals of Cleveland and joined Cleveland  
1247 Clinic Foundation during the trial

1248 a. All patients at UH were attempted to be contacted and re consented to  
1249 follow up with Dr. Rosen at CCF.

1250 b. History of clinicaltrials.gov transfers

1251 i. Original NCT01746316

1252 1. Initial release: 11/5/2012

1253 2. Published 12/7/2012

1254 ii. Transferred to CCF new NCT0245176

1255 1. Changed 5/8/2014

1256 2. 5/19/15- Recurrences were further classified by Midline, Parastomal only, or both  
1257 (midline and parastomal component)

1258 3. 4/23/19-Ventral hernia recurrence inventory questions were added to long term  
1259 follow up assessments.

1260 4. 9/24/19- As a last effort in the final phase of this study we gained IRB approval to

1261 mail study questions with a \$10 bill and a SASE to patients who have not

1262 completed the 2 year follow-up questions. We will thank them for their

1263 participation in the study along with asking them to complete the questions and

1264 return to us in the SASE. We have left messages with the patients who have

1265 working voice-mails, asking them to return the call to either make an

1266 appointment, set up a virtual visit or answer the questions over the phone.

1267 Unfortunately, some of the patients do not have an answering machine or a

1268 current telephone number listed in EPIC.

1269

1270 **Final Statistical Analysis Plan**

1271 **Any changes to original statistical plan are highlighted in yellow for**  
1272 **reference.**

1273 **1. Baseline Description of Variables**

1274 Continuous data were described using median values with interquartile ranges  
1275 (IQR) and comparisons made using Wilcoxon's rank sum test. Categorical data  
1276 were described using counts and proportions with comparisons performed using  
1277 Pearson's chi square or Fisher's exact test.

1278 Tables of summary statistics will be produced by randomized group for a number  
1279 of baseline variables. The number of missing observations will also be reported.

1280 **2. Outcomes**

1281

1282 **2.1 Primary outcomes**

1283 The primary outcomes are rates of surgical site occurrences requiring  
1284 procedural intervention (SSOPI) and hernia recurrence (HR) assessed  
1285 postoperatively at 1 month, 6 months, 12 months, and 24 months.

1286

1287 **2.2 Secondary outcomes**

1288 The secondary outcomes are quality of life (QOL), which includes VAS,  
1289 EQ5D and HerQles scores. They'll be measured at baseline, 30 days, 6  
1290 months, 12 months and 24 months.

1291 Direct costs, 30 day costs, and prosthetic material costs associated with  
1292 clean-contaminated and contaminated open ventral hernia repair will also be  
1293 explored.

1294

1295 **3. Handling of missing values**

1296 When analyzing using the ITT population, model based multiple imputation  
1297 method will be used to impute missing data at baseline, under the assumption  
1298 that the missing data has pattern of missing at random. Since the outcomes are  
1299 repeated measured, the follow up missing will not be imputed but taken care of  
1300 by mixed effect model.

1301

1302 **4. Statistical method**

1303

1304 **4.1 Statistical procedures for primary outcomes**

1305 Primary analysis

1306 For SSOPI with 4 repeated binary measurements, a generalized mixed model  
1307 analysis with repeated measures will be performed to determine if a  
1308 significant difference exists between the biologic mesh and the permanent  
1309 synthetic mesh cohorts in the rate of SSOPI.

1310 For Hernia Recurrence, which is a single binary outcome, simple chi-square  
1311 tests will be used for unadjusted analyses and a logistic regression model will  
1312 be used for adjusted analyses. As this is a randomized trial, differences in  
1313 baseline demographic and clinical characteristics between the biologic mesh  
1314 cohort and the permanent synthetic mesh cohort are expected to occur at  
1315 random. Any significant differences found among the demographic or  
1316 preoperative clinical characteristics between the two treatment groups will be  
1317 controlled for in the final analysis to limit potential confounding of results.

1318 Prespecified Covariates:

1319 Demographics: age, race, gender, study center, and mesh type

1320 Known linkages to hernia recurrence: BMI, history of smoking, size of  
1321 defect (hernia width), number of previous hernia repairs, and mesh  
1322 type.

1323 **Post Hoc Additional Covariates:**

1324 **Given Baseline differences in mesh width and length between the**  
1325 **two groups, additional covariates were added to the model. Mesh**  
1326 **Width was included.**

1327

### 1328 **Secondary analysis**

1329 These primary outcomes will also be assessed as time-to-hernia-recurrence,  
1330 respectively. In these analyses, the time-to-recurrence in the synthetic mesh  
1331 group will be compared to the time-to-recurrence in the biologic mesh group  
1332 using a two-sided log-rank test. The null hypothesis is that the time-to-  
1333 recurrence is the same between the two groups ( $H_0$ : Hazard Ratio = 1), and  
1334 the alternative hypothesis is that the time-to-recurrence is significantly greater  
1335 for the permanent synthetic mesh cohort compared to the biologic mesh  
1336 cohort ( $H_1$ : Hazard Ratio  $\neq$  1). Since this is a randomized clinical trial,  
1337 observed differences in other covariates between the two study groups are  
1338 assumed to arise by chance. Therefore, the simple unadjusted analysis is  
1339 sufficient to answer the research question, assuming adequate power (see  
1340 above). However, since the association between other covariates and time-  
1341 to-recurrence may be of interest and because group imbalances may occur  
1342 due to chance, it is of interest to consider further analyses that adjust for  
1343 covariates in the relationship of time-to-recurrence and mesh type. To that  
1344 end, the following multivariable models are pre-specified: 1) Demographics:  
1345 age, race, gender, and study center; and 2) Known linkages to hernia

1346 recurrence: BMI, history of smoking, size of defect (Hernia width), number of  
1347 previous hernia repairs, and mesh type. These models will be fit with Cox  
1348 proportional hazards models. The assumption of proportional hazard will be  
1349 tested. When the proportional hazard assumption is violated, time dependent  
1350 variables will be introduced to the model.

1351

1352 **Post Hoc Additional Covariates:**

1353 **Given Baseline differences in mesh width and length between the two**  
1354 **groups, additional covariates were added to the model. Mesh Width was**  
1355 **included**

1356

#### 1357 **4.2 Statistical procedures for secondary outcomes**

1358 The secondary outcomes are quality of life (QOL) and Cost. The assessment  
1359 of the association between these outcomes and mesh type will parallel what  
1360 was described above for the primary outcome. The differences are as  
1361 follows. First, the primary analysis will utilize an ANCOVA model adjusting  
1362 for baseline pain (QOL) and correlations among repeated measurements.  
1363 The null hypothesis is that the pain (QOL) is the same, on average, between  
1364 the synthetic and biologic mesh groups ( $H_0: \text{Beta-mesh-type} = 0$ ). The  
1365 alternative hypothesis is that the pain (QOL) is different, on average, between  
1366 the two groups ( $H_1: \text{Beta-mesh-type} \neq 0$ ). Second, the multivariable  
1367 modeling will utilize linear regression models. A mixed model analysis with  
1368 repeated measures will be performed to determine if a significant difference  
1369 exists between the biologic mesh and the permanent synthetic mesh cohorts  
1370 in the mean change in score from the preoperative assessment to the  
1371 postoperative assessments at 1 month, 6 months, 12 months, and 24 months

1372 for the EQ-5D and HerQLes quality of life instruments. The null hypothesis is  
1373 that there is no significant difference between the biologic mesh and the  
1374 permanent synthetic mesh cohorts in the mean change in score from the  
1375 preoperative to the postoperative assessments at any of the time points for  
1376 either the EQ-5D or the HerQLes quality of life instruments. The alternate  
1377 hypothesis is that there is a significantly greater change in EQ-5D and  
1378 HerQLes scores from the preoperative assessment to the postoperative  
1379 assessment at each of the time points for the permanent synthetic mesh  
1380 cohort compared to the biologic mesh cohort

1381 To determine direct economic costs associated with clean-  
1382 contaminated and contaminated open ventral hernia repair. Costs associated  
1383 with the operative, and postoperative phases of care up to 30 days will be  
1384 considered as it pertains to the management of the ventral hernia. Final  
1385 operative costs will be based on each patient's actual inpatient encounter  
1386 direct cost obtained from the participating institutions. Prosthetic mesh costs  
1387 will also be extracted. Postoperative costs will account for routine outpatient  
1388 visits, costs incurred for complications, up to 30 days due ventral hernia  
1389 management. All costs will be reported in U.S. dollars.

1390 **Adverse events**

1391 Adverse events are reported throughout the trial and tabulations of all  
1392 reported adverse events will be provided, subdivided by treatment group.

1393 Adverse events will be compared by 3 measures:

- 1394 1. Overall adverse event rates
- 1395 2. Clavien Dindo Grades I-V
- 1396 3. Comprehensive Complications Index (Score 1-100)

1397

1398 **Handling of missing data**

1399 Very little data is anticipated in the baseline demographics and operative details.

1400

1401 We anticipate up to a 20% lost to follow up for the primary analysis of 24 months hernia

1402 recurrence and SSOPI rates. Patients who died or were not available for follow up will

1403 be excluded from that time point analysis.

1404

1405
