# Supplementary material
Source: PubMed Central journal article supplement (PMC8771431)
Supplement: jamasurg-e216902-s004.pdf [file jamasurg-e216902-s004.pdf]

## **Data Sharing Statement**

Rosen. Biologic vs Synthetic Mesh for Single-Stage Repair of Contaminated Ventral Hernias. *JAMA Surg.* Published January 19, 2022. doi:10.1001/jamasurg.2021.6902

### **Data**

**Data available:** No
